# Supplementary material
Source: PubMed Central journal article supplement (PMC4356341)
Supplement: cdd2014189x2.pdf [file cdd2014189x2.pdf]

## Supplementary Table 1

Q-PCR analysis of transcriptional activity of the p53-ER fusion in Mdm2/p53 double-knockout mouse embryonic fibroblasts.

|    | Fold Change to Ctrl-4OHT          |          |      |
|----|-----------------------------------|----------|------|
|    | Ctrl+4OHT                         | p53+4OHT |      |
|    | <b>p53</b>                        | 0.9      | 67.9 |
|    | <b>Wip1</b>                       | 0.7      | 4.0  |
| *  | <b>Mdm4</b>                       | 1.1      | 8.8  |
|    | <b>p53R2</b>                      | 1.4      | 5.0  |
|    | <b>Xpc</b>                        | 1.4      | 5.1  |
|    | <b>p21</b>                        | 0.8      | 68.6 |
|    | <b>Reprimo</b>                    | 1.3      | 79.7 |
| *  | <b>CyclinG2</b>                   | 1.0      | 7.0  |
|    | <b>Cdc25a</b>                     | 1.2      | 1.6  |
|    | <b>14-3-3 <math>\gamma</math></b> | 0.8      | 7.1  |
|    | <b>Snk</b>                        | 1.4      | 2.6  |
| *  | <b>p16INK4a</b>                   | 1.2      | 2.0  |
| *  | <b>p19Arf</b>                     | 1.3      | 1.4  |
|    | <b>Trp53INP1</b>                  | 0.5      | 33.5 |
|    | <b>Noxa</b>                       | 1.4      | 99.1 |
|    | <b>Fas</b>                        | 1.2      | 44.7 |
|    | <b>Perp</b>                       | 1.3      | 37.3 |
|    | <b>Puma</b>                       | 2.2      | 9.3  |
|    | <b>p2XM</b>                       | 1.3      | 9.0  |
|    | <b>Bax</b>                        | 1.6      | 5.4  |
|    | <b>Pig6</b>                       | 1.6      | 1.6  |
|    | <b>IGF-BP3</b>                    | 0.9      | 1.2  |
| ** | <b>HPRT</b>                       | 1.9      | 6.7  |
| ** | <b>YWHAZ</b>                      | 1.2      | 1.1  |
| ** | <b>GAPDH</b>                      | 0.9      | 0.9  |

\* Genes not directly regulated by p53

\*\* House keeping genes
